# Supplementary material for: Association of Impaired Reactive Aldehyde Metabolism with Delayed Graft Function in Human Kidney Transplantation
Source: Hindawi journal article supplement (doi:10.1155/2018/3704129), 2018-01-01
Supplement: f1 [file 3704129.f1.pdf]

Supplemental Material:

**Association of impaired reactive aldehyde metabolism with delayed graft function in human kidney transplantation**

Leonie G.M. Wijermars, Bsc<sup>1</sup>, Alexander F. Schaapherder, MD, PhD<sup>1</sup>, Thomas George, BS<sup>2</sup>, Pritam Sinharoy, PhD<sup>2</sup>, Eric R. Gross MD, PhD<sup>2</sup>.

<sup>1</sup>Department of Surgery, Leiden University Medical Center, PO Box 9600, 2300 RC Leiden, The Netherlands.

<sup>2</sup>Department of Anesthesiology, Perioperative and Pain Medicine, School of Medicine, Stanford University, 300 Pasteur Drive H3580, Stanford, 94305-5640 California, The United States.

Correspondence: Eric R. Gross MD, PhD, Department of Anesthesiology, Perioperative and Pain Medicine, School of Medicine, Stanford University, email: [ergross@stanford.edu](mailto:ergross@stanford.edu).

### **Supplemental Material:**

***Microarray studies:*** Microarray analysis was performed using Illumina whole-genome gene expression BeadChips. The gene array expression for the other ALDH family of enzymes on the microarray (besides ALDH2, ALDH4A1, and ALDH7A1 that were presented in the non-supplemental portion of the manuscript) are presented in Supplemental Figure 1.

***qPCR primer validation:*** Primer design and validation for ALDH2, ALDH4A1, ALDH7A1, and ALDH1A1 are presented in Supplemental Figure 2.

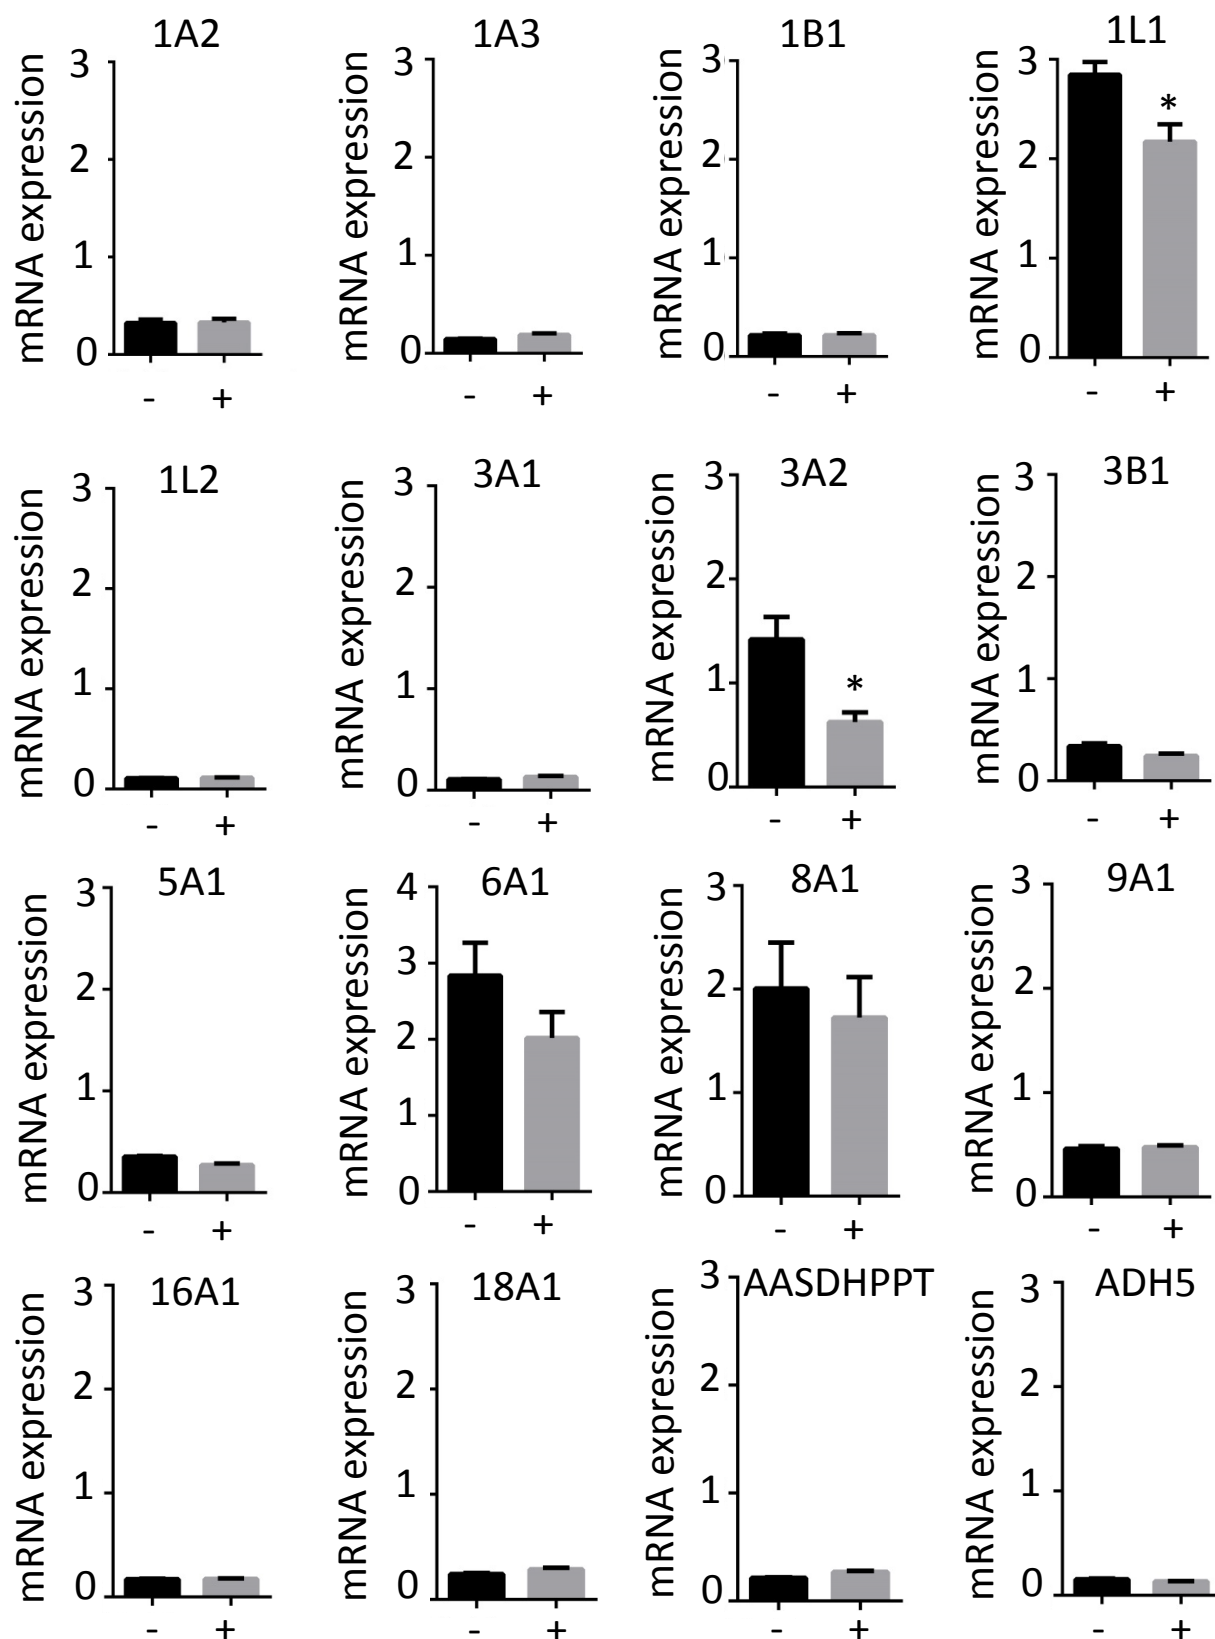

**Supplemental Figure 1. ALDH family of enzymes gene array results.** 16 additional ALDH enzyme family genes. Of the 16 genes, only ALDH1L1 and ALDH3A2 showed significant differences between the kidneys that did not develop delayed graft function (-) compared to those kidneys that developed delayed graft function (+). \*P<0.01.

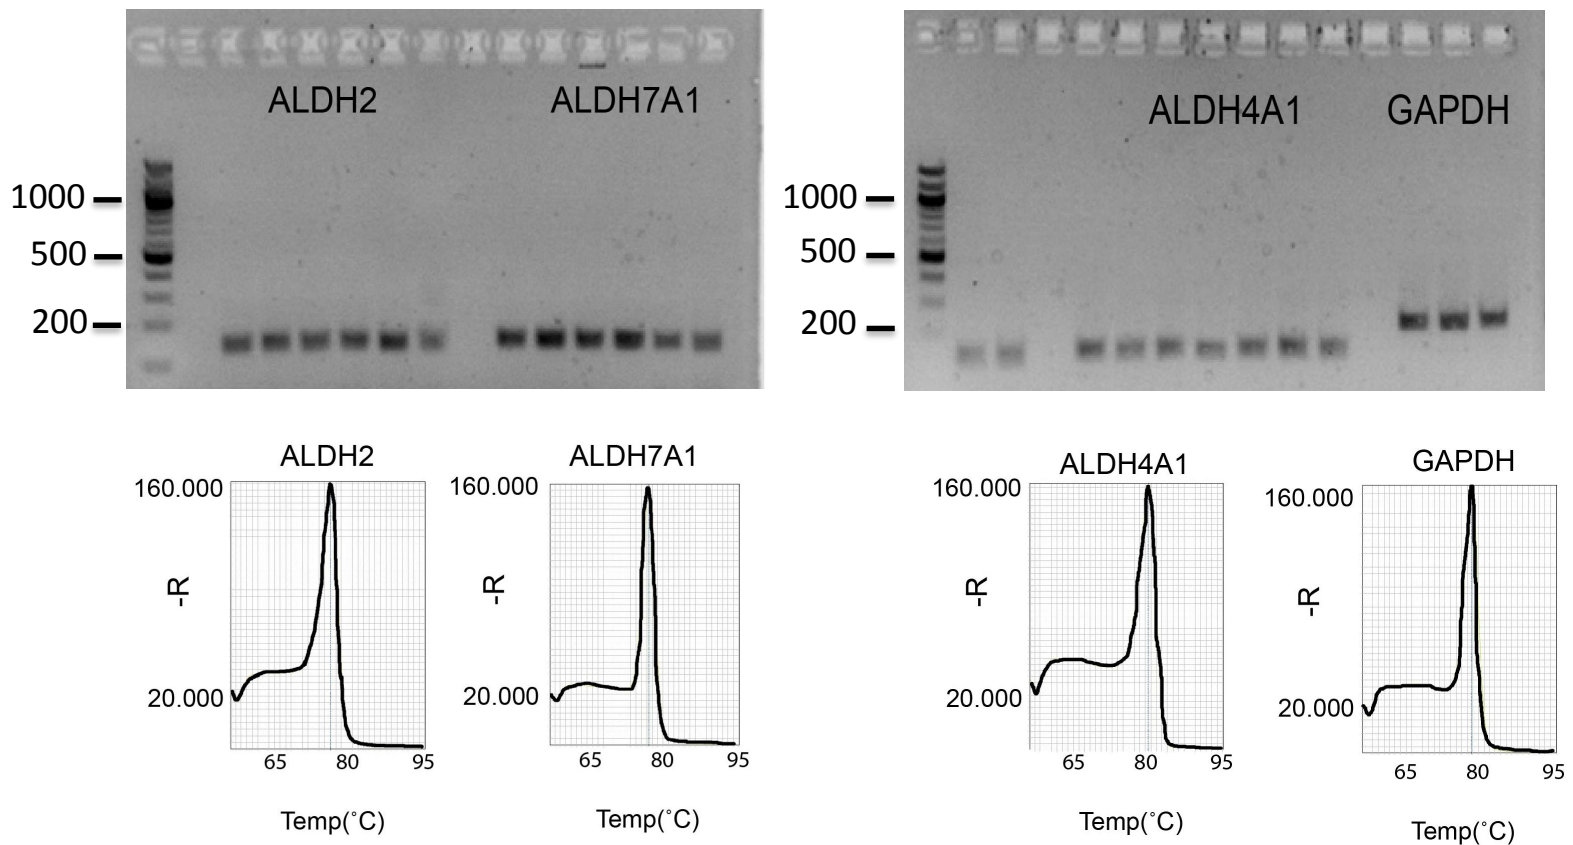

**Supplemental Figure 2. qPCR studies.** Gene products run on DNA gel after qPCR for each primer set used. Further representative melt curve produced for each qPCR product.
